# Supplementary material for: Probing the redox-conversion of Co(ii)-disulfide to Co(iii)-thiolate complexes: the effect of ligand-field strength
Source: Royal Society of Chemistry journal article supplement (doi:10.1039/d2dt00356b), 2022-01-01
Supplement: d2dt00356b1.pdf [file d2dt00356b1.pdf]

## Supplementary Information for

# Probing The Redox-conversion of Co(II)-disulfide to Co(III)-thiolate Complexes: The Effect of Ligand Field Strength

*Christian Marvelous,<sup>a</sup> Lucas de Azevedo Santos,<sup>b</sup> Maxime A. Siegler,<sup>c</sup>*

*Célia Fonseca Guerra,<sup>a,b\*</sup> and Elisabeth Bouwman<sup>a\*</sup>*

<sup>a</sup> Leiden Institute of Chemistry, Gorlaeus Laboratories, Leiden University, P.O. Box 9502,  
2300 RA Leiden, The Netherlands

<sup>b</sup> Department of Theoretical Chemistry, Amsterdam Institute of Molecular and Life Sciences  
(AIMMS), Amsterdam Center for Multiscale Modeling (ACMM),  
Vrije Universiteit Amsterdam, De Boelelaan 1083, 1081 HV Amsterdam, The Netherlands

<sup>c</sup> Department of Chemistry, Johns Hopkins University, 3400 N. Charles Street, Baltimore,  
Maryland 21218, United States of America

Corresponding authors: c.fonsecaguerra@vu.nl / bouwman@lic.leidenuniv.nl

## Part 1 – Synthesis of Compound [Co(L<sup>1</sup>S)(phen)](SbF<sub>6</sub>)<sub>2</sub> .....3

## Part 2 – Experimental Data

|                                                                                                                                                                                                                  |   |
|------------------------------------------------------------------------------------------------------------------------------------------------------------------------------------------------------------------|---|
| <b>Figure S1.</b> ESI-MS spectrum of a) [1 <sub>Cl</sub> ] dissolved in acetonitrile; b) the experimental isotopic distribution of the main signals; c) simulated isotopic distribution of the main signals..... | 3 |
| <b>Figure S2.</b> ESI-MS spectrum of a) [1 <sub>Br</sub> ] dissolved in acetonitrile; b) the experimental isotopic distribution; c) simulated isotopic distribution. ....                                        | 4 |
| <b>Figure S3.</b> <sup>1</sup> H-NMR spectrum of compound [1 <sub>Cl</sub> ] dissolved in CD <sub>3</sub> CN. ....                                                                                               | 4 |
| <b>Figure S4.</b> <sup>1</sup> H-NMR spectrum of compound [1 <sub>Br</sub> ] dissolved in CD <sub>3</sub> CN. ....                                                                                               | 4 |
| <b>Figure S5.</b> ESI-MS spectrum of a) [2 <sub>Cl</sub> ](BPh <sub>4</sub> ) <sub>2</sub> dissolved in methanol; b) the experimental isotopic distribution; c) simulated isotopic distribution.....             | 5 |
| <b>Figure S6.</b> <sup>1</sup> H-NMR spectrum of compound [2 <sub>Cl</sub> ](BPh <sub>4</sub> ) <sub>2</sub> dissolved in DMSO-d <sub>6</sub> . ....                                                             | 5 |
| <b>Figure S7.</b> <sup>1</sup> H-NMR spectrum of compound [3](SbF <sub>6</sub> ) <sub>2</sub> (black trace) dissolved in CD <sub>3</sub> CN. ....                                                                | 6 |
| <b>Figure S8.</b> ESI-MS spectrum of a) [3](SbF <sub>6</sub> ) <sub>2</sub> dissolved in acetonitrile; b) the experimental isotopic distribution; c) simulated isotopic distribution.....                        | 6 |

|                                                                                                                                                                                                                                                                                            |   |
|--------------------------------------------------------------------------------------------------------------------------------------------------------------------------------------------------------------------------------------------------------------------------------------------|---|
| <b>Figure S9.</b> ESI-MS spectrum of a) the isolated brown-reddish powder from the reaction between $[2_{Cl}](BPh_4)_2$ with $AgSbF_6$ , the powder was dissolved in acetonitrile; b) the experimental isotopic distribution; c) simulated isotopic distribution.....                      | 7 |
| <b>Figure S10.</b> ESI-MS spectrum of a) the isolated purple powder from the reaction between $[3](SbF_6)_2$ with $NEt_4Cl$ , the powder was dissolved in acetonitrile; b) the experimental isotopic distribution; c) the experimental isotopic distribution for compound $[1_{Cl}]$ ..... | 7 |
| <b>Figure S11.</b> $^1H$ -NMR spectrum of the isolated purple powder from the reaction between $[3](SbF_6)_2$ with $NEt_4Cl$ , the powder was dissolved in $CD_3CN$ .....                                                                                                                  | 8 |
| <b>Figure S12.</b> ESI-MS spectrum of a) $[Co(L^1S)(phen)](SbF_6)_2$ , the powder was dissolved in acetonitrile; b) the experimental isotopic distribution; c) simulated isotopic distribution. ....                                                                                       | 8 |
| <b>Figure S13.</b> Displacements ellipsoid plot (50% probability level) of the oxidized compound $[Co(L^1SO_2)(phen)](SbF_6)_2$ at 110(2) K.....                                                                                                                                           | 9 |

### Part 3 – Crystallographic Data

|                                                                                                  |    |
|--------------------------------------------------------------------------------------------------|----|
| <b>Table S1.</b> Crystallographic Data for the crystal structures in the present work.....       | 10 |
| <b>Table S2.</b> Selected bond distances and bond angles in $[Co(L^1SO_2)(phen)](SbF_6)_2$ ..... | 11 |

### Part 4 – Computational Data

|                                                                                                                                                                                 |    |
|---------------------------------------------------------------------------------------------------------------------------------------------------------------------------------|----|
| <b>Table S3.</b> Bond energies and coordinates of the optimized structures of $[1^*]$ and $[4]^{2+}$ . ....                                                                     | 12 |
| <b>Table S4.</b> Bond energies and coordinates of the optimized structures of $[2^*]^{+}_{fac}$ and $[2^*]^{+}_{mer}$ . ....                                                    | 13 |
| <b>Table S5.</b> Bond energies and coordinates of the optimized structures of $[3]^{2+}_{fac}$ and $[3]^{2+}_{mer}$ . ....                                                      | 14 |
| <b>Figure S14.</b> Several frontier orbitals of $[1^*]$ associated with Co d-orbitals along with their energies, orbital visualization, and orbital composition. ....           | 15 |
| <b>Figure S15.</b> Several frontier orbitals of $[2^*]^{+}_{fac}$ associated with Co d-orbitals along with their energies, orbital visualization, and orbital composition. .... | 16 |
| <b>Figure S16.</b> Several frontier orbitals of $[2^*]^{+}_{mer}$ associated with Co d-orbitals along with their energies, orbital visualization, and orbital composition. .... | 17 |
| <b>Figure S17.</b> Several frontier orbitals of $[3]^{2+}_{mer}$ associated with Co d-orbitals along with their energies, orbital visualization, and orbital composition. ....  | 18 |
| <b>Figure S18.</b> Several frontier orbitals of $[4]^{2+}$ associated with Co d-orbitals along with their energies, orbital visualization, and orbital composition. ....        | 19 |

## Part 1 – Synthesis of Compound [Co(L<sup>1</sup>S)(phen)](SbF<sub>6</sub>)<sub>2</sub>

The compound [Co(L<sup>1</sup>S)(phen)](SbF<sub>6</sub>)<sub>2</sub> was prepared in a similar manner as compound [3](SbF<sub>6</sub>)<sub>2</sub>, using 1,10-phenanthroline (phen) instead of bpy. A red powder was obtained in 85% yield. IR (neat, cm<sup>-1</sup>): 1608s, 1518m, 1485w, 1426s, 1376w, 1344w, 1298w, 1247w, 1225w, 1149w, 1105m, 1091m, 1058m, 1022m, 979w, 955w, 909w, 869w, 847s, 769s, 726s, 649vs, 569m, 526m, 448m, 421s. ESI-MS in acetonitrile calcd. for [Co(L<sup>1</sup>S)(phen)](SbF<sub>6</sub>)<sup>+</sup> *m/z* 732.0, found *m/z* 732.0; calcd. for [Co(L<sup>1</sup>S)(phen)]<sup>2+</sup> *m/z* 248.55, found *m/z* 248.6; calcd. for [Co(phen)<sub>3</sub>]<sup>2+</sup> *m/z* 299.6, found *m/z* 299.9. Elemental analysis (%) for [Co(L<sup>1</sup>S)(phen)](SbF<sub>6</sub>)<sub>2</sub>, calcd. C, 32.23; H, 2.50; N, 7.23; found C, 33.03; H, 2.48; N, 7.18. Single crystals were obtained by vapor diffusion of dry and deoxygenated diethyl ether into the dry and deoxygenated acetonitrile solution of compound [Co(L<sup>1</sup>S)(phen)](SbF<sub>6</sub>)<sub>2</sub>.

## Part 2 – Experimental Data

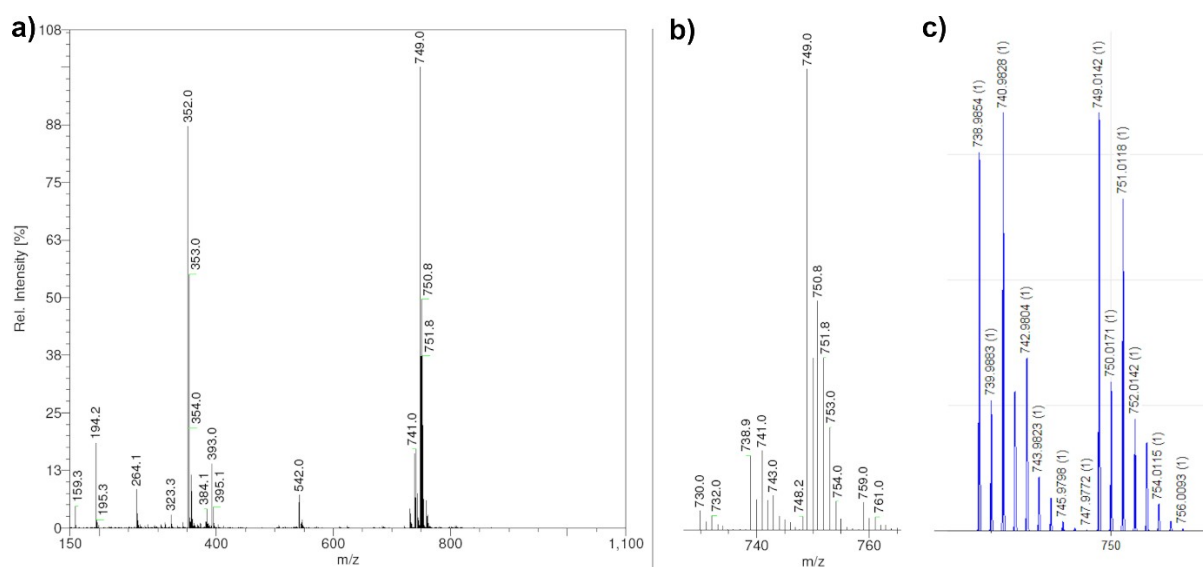

**Figure S1.** ESI-MS spectrum of a) [1<sub>Cl</sub>] dissolved in acetonitrile; b) the experimental isotopic distribution of the main signals; c) simulated isotopic distribution of the main signals. ESI-MS found (calcd.) for [1<sub>Cl</sub> – 2Cl]<sup>2+</sup> *m/z* 352.0 (352.0), for [1<sub>Cl</sub> – Cl]<sup>+</sup> *m/z* 741.0 (741.0), and for [1<sub>Cl</sub> – 2Cl + HCOO<sup>-</sup>]<sup>+</sup> *m/z* 749.0 (749.0).

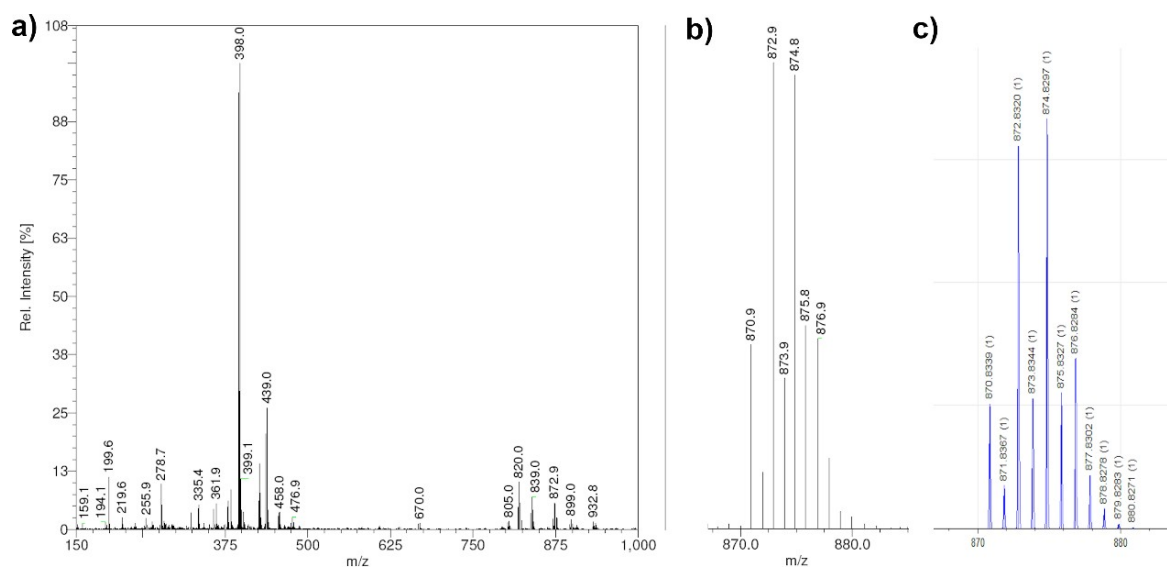

**Figure S2.** ESI-MS spectrum of a)  $[1_{Br}]$  dissolved in acetonitrile; b) the experimental isotopic distribution; c) simulated isotopic distribution. ESI-MS found (calcd.) for  $[1_{Br} - 2Br^-]^{2+}$   $m/z$  398.0 (397.9), for  $[1_{Br} - 2Br^- + HCOO^-]^+$   $m/z$  839.0 (838.9), and for  $[1_{Br} - Br^-]^+$   $m/z$  872.9 (872.8).

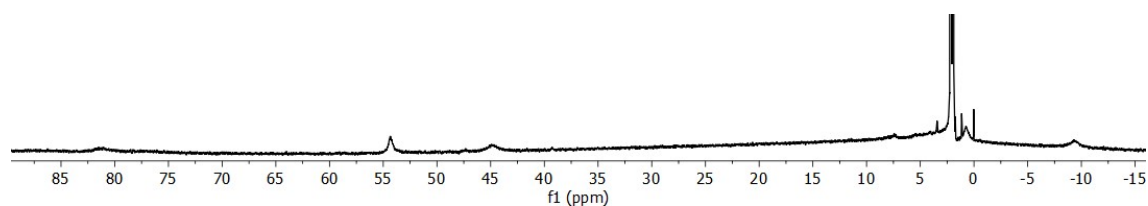

**Figure S3.**  $^1H$ -NMR spectrum of compound  $[1_{Cl1}]$  dissolved in  $CD_3CN$ .

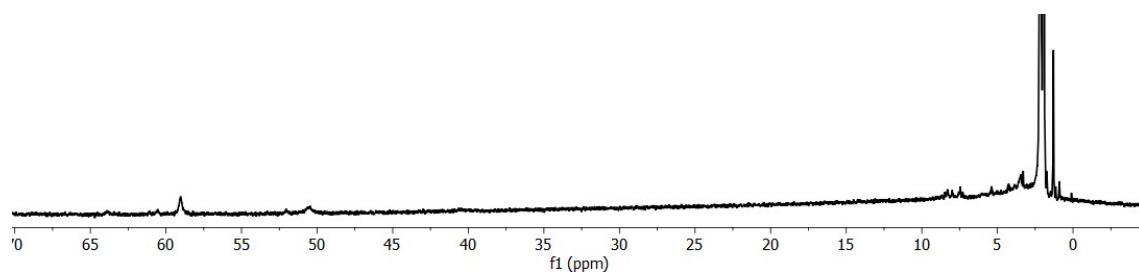

**Figure S4.**  $^1H$ -NMR spectrum of compound  $[1_{Br1}]$  dissolved in  $CD_3CN$ .

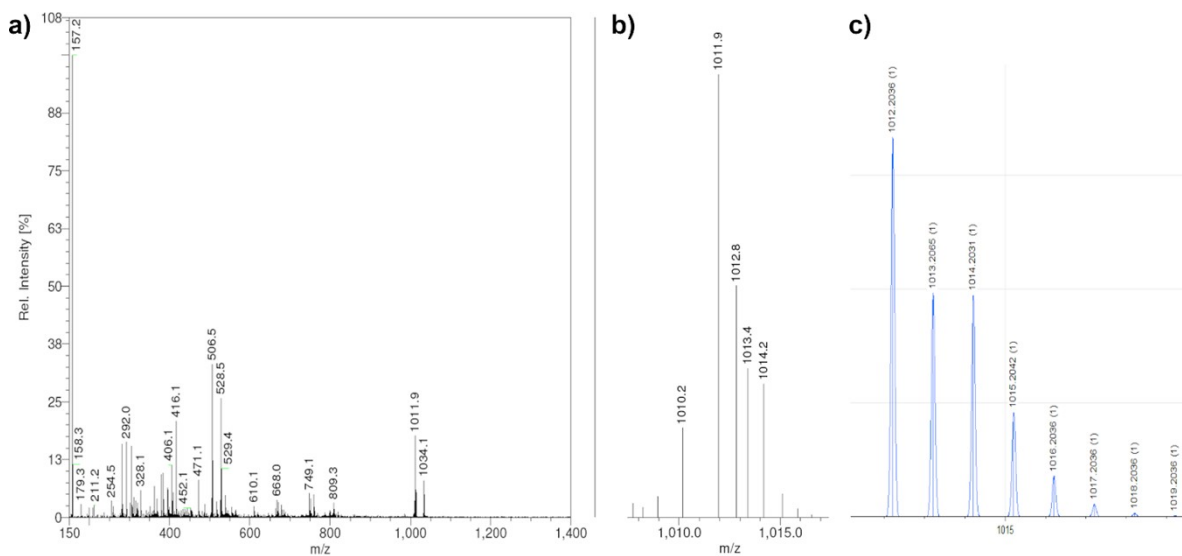

**Figure S5.** ESI-MS spectrum of a)  $[2_{Cl}](BPh_4)_2$  dissolved in methanol; b) the experimental isotopic distribution; c) simulated isotopic distribution. ESI-MS found (calcd.) for  $[2_{Cl} - Cl^- + OMe^-]^{2+}$   $m/z$  506.5 (506.1), for partially reduced species  $[2_{Cl} - Cl^- + OMe^-]^+$   $m/z$  1011.9 (1012.2).

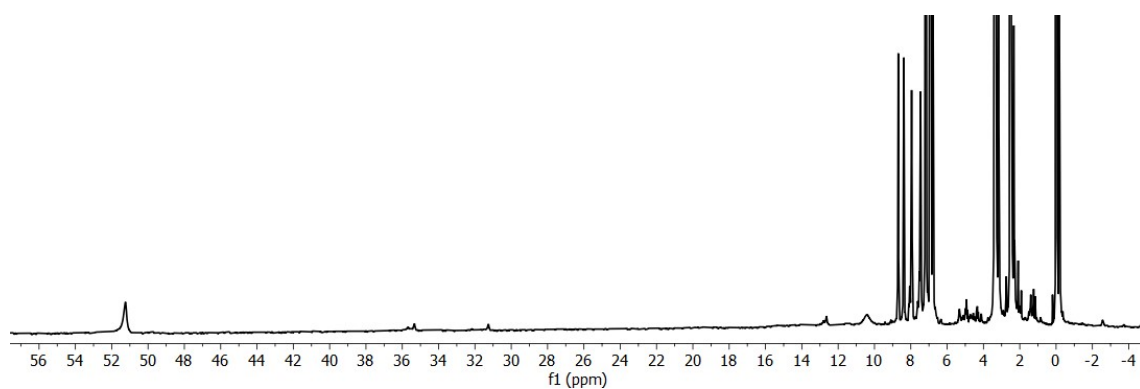

**Figure S6.**  $^1H$ -NMR spectrum of compound  $[2_{Cl}](BPh_4)_2$  dissolved in  $DMSO-d_6$ . The diamagnetic region contains peaks that corresponds to the ligand  $L^1SSL^1$  and bipyridine, indicating dissociation of the ligand upon dissolution of the compound.

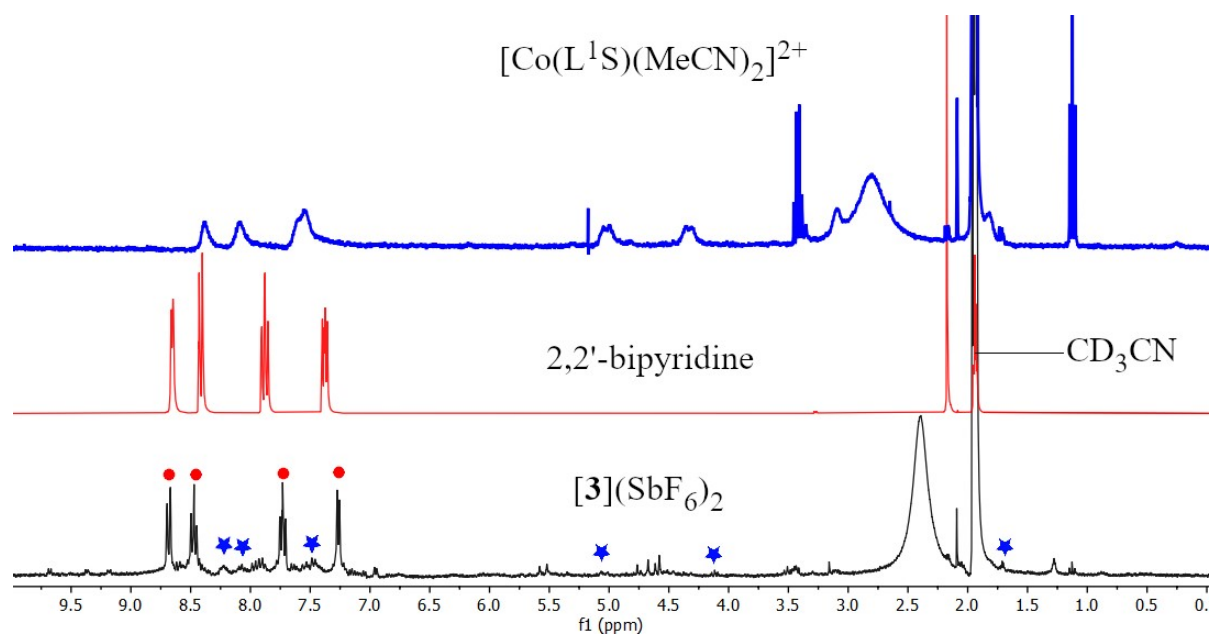

**Figure S7.**  $^1\text{H-NMR}$  spectrum of compound  $[\mathbf{3}](\text{SbF}_6)_2$  (black trace) dissolved in  $\text{CD}_3\text{CN}$ .  $^1\text{H-NMR}$  spectrum of  $[\text{Co}(\text{L}^1\text{S})(\text{MeCN})_2]^{2+}$  (blue trace) and 2,2'-bipyridine (red trace) dissolved in  $\text{CD}_3\text{CN}$  are provided. The red dots and blue stars indicated the presence of 2,2'-bipyridine and  $[\text{Co}(\text{L}^1\text{S})(\text{MeCN})_2]^{2+}$ , respectively.

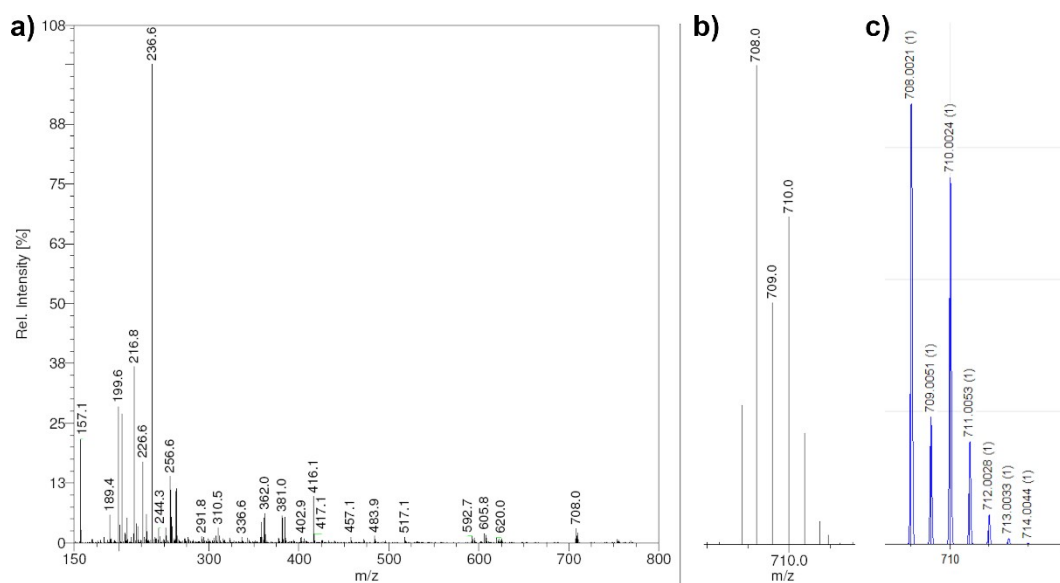

**Figure S8.** ESI-MS spectrum of a)  $[\mathbf{3}](\text{SbF}_6)_2$  dissolved in acetonitrile; b) the experimental isotopic distribution; c) simulated isotopic distribution. ESI-MS found (calcd.) for  $[\mathbf{3}]^{2+}$   $m/z$  236.6 (236.55), for  $[\mathbf{3}](\text{SbF}_6)^+$   $m/z$  708.0 (708.0). Species  $[\text{Co}(\text{L}^1\text{S})(\text{MeCN})_2]^{2+}$  ( $m/z$  199.6 (199.55)) and  $[2,2'\text{-bipyridine} + \text{H}]^+$  ( $m/z$  157.1 (157.0)) are present.

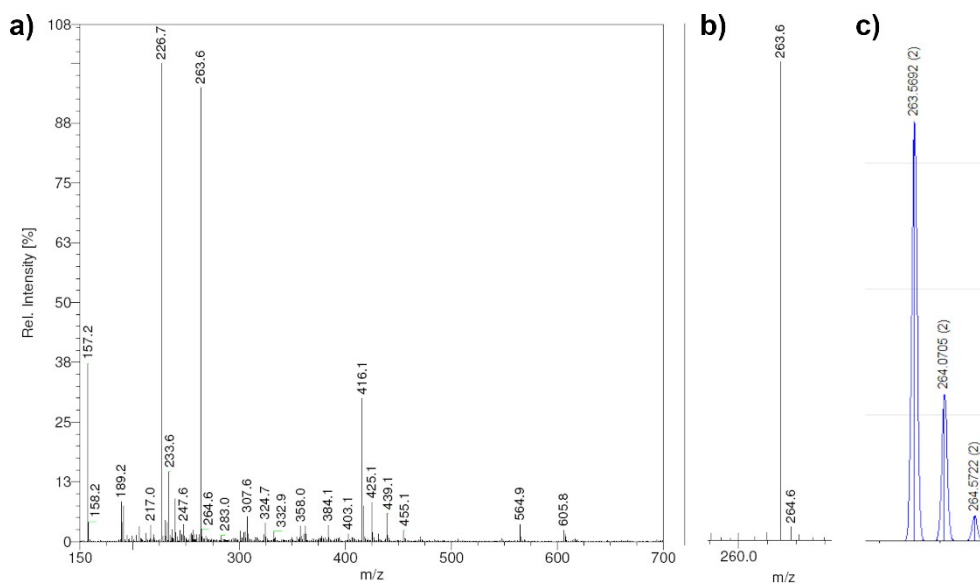

**Figure S9.** ESI-MS spectrum of a) the isolated brown-reddish powder from the reaction between  $[\mathbf{2}_{\text{Cl}}](\text{BPh}_4)_2$  with  $\text{AgSbF}_6$ , the powder was dissolved in acetonitrile; b) the experimental isotopic distribution; c) simulated isotopic distribution. ESI-MS found (calcd.) for  $[(\text{Co}(\text{bpy})_3)]^{2+}$   $m/z$  263.6 (263.6).

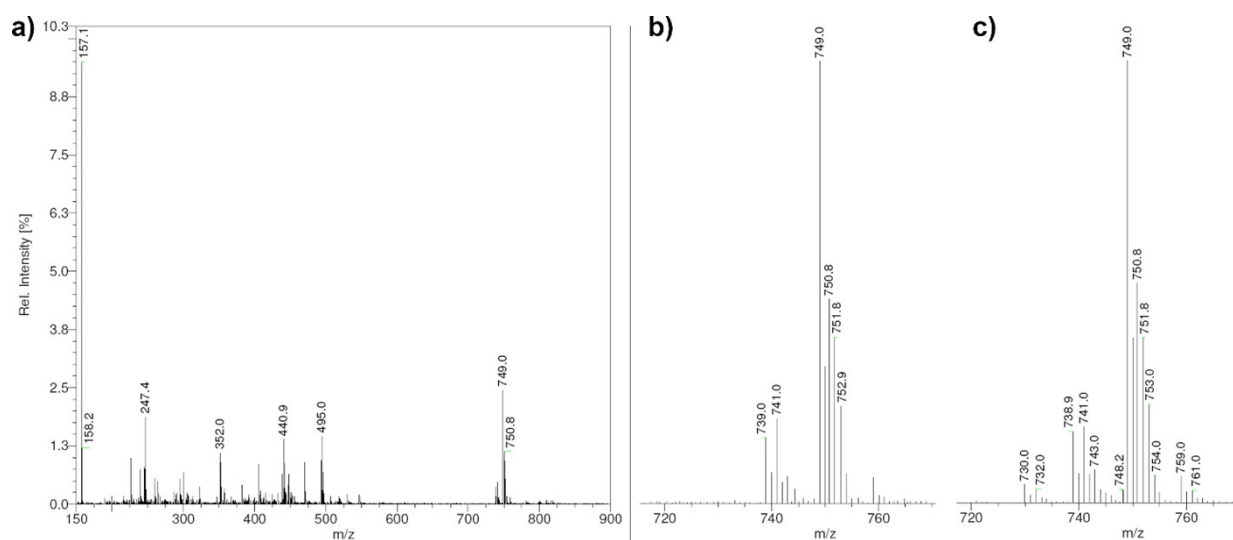

**Figure S10.** ESI-MS spectrum of a) the isolated purple powder from the reaction between  $[\mathbf{3}](\text{SbF}_6)_2$  with  $\text{NEt}_4\text{Cl}$ , the powder was dissolved in acetonitrile; b) the experimental isotopic distribution; c) the experimental isotopic distribution for compound  $[\mathbf{1}_{\text{Cl}}]$ . ESI-MS found (calcd.) for  $[\mathbf{1}_{\text{Cl}} - 2\text{Cl}]^{2+}$   $m/z$  352.0 (352.0), for  $[\mathbf{1}_{\text{Cl}} - \text{Cl}]^+$   $m/z$  741.0 (741.0), and for  $[\mathbf{1}_{\text{Cl}} - 2\text{Cl} + \text{HCOO}]^+$   $m/z$  749.0 (749.0).

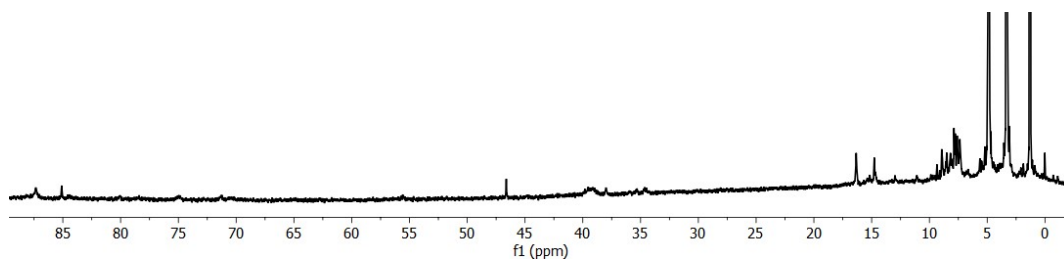

**Figure S11.**  $^1\text{H}$ -NMR spectrum of the isolated purple powder from the reaction between  $[\mathbf{3}](\text{SbF}_6)_2$  with  $\text{NEt}_4\text{Cl}$ , the powder was dissolved in  $\text{CD}_3\text{CN}$ .

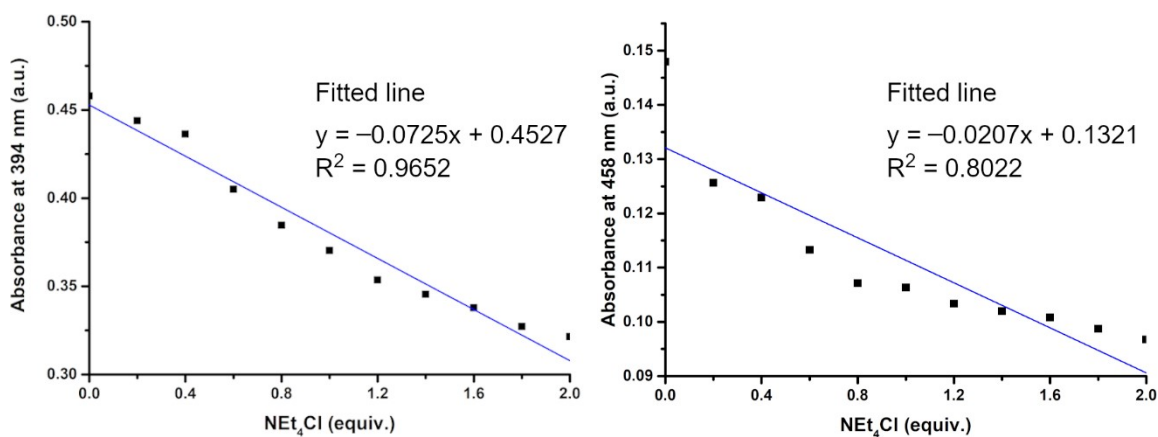

**Figure S12.** Changes of absorbance at 394 nm and 458 nm as a function of the amount of added  $\text{NEt}_4\text{Cl}$  to 5 mM solution of  $[\mathbf{3}](\text{SbF}_6)_2$ . Linear fitting details are provided.



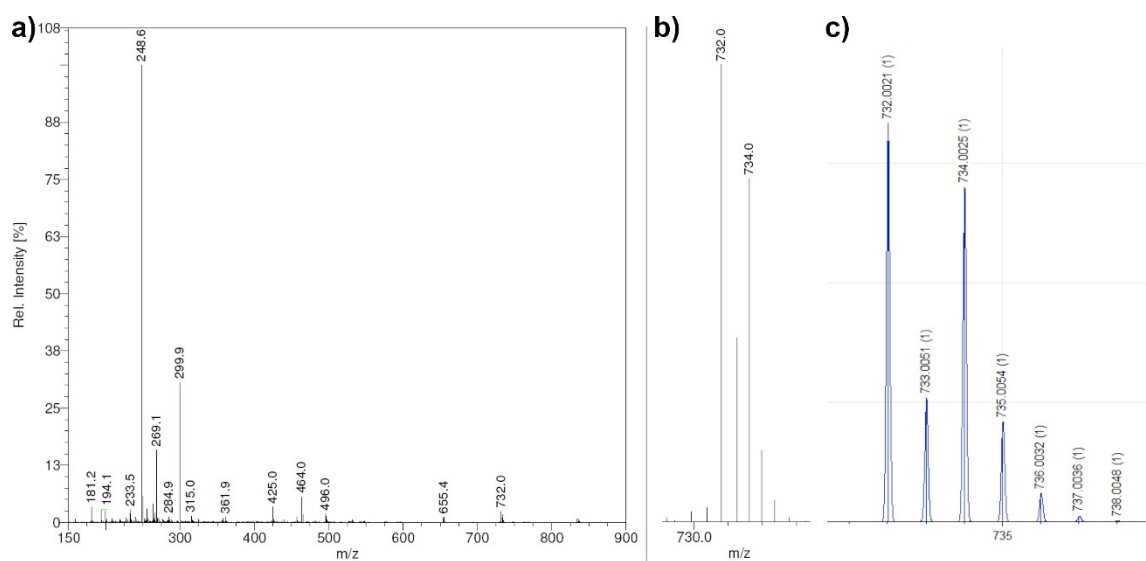

**Figure S13.** ESI-MS spectrum of a)  $[\text{Co}(\text{L}^1\text{S})(\text{phen})](\text{SbF}_6)_2$ , the powder was dissolved in acetonitrile; b) the experimental isotopic distribution; c) simulated isotopic distribution. ESI-MS found (calcd.) for  $[\text{Co}(\text{L}^1\text{S})(\text{phen})]^{2+}$   $m/z$  248.6 (248.55) and for  $[\text{Co}(\text{L}^1\text{S})(\text{phen})](\text{SbF}_6)^+$   $m/z$  732.0 (732.0). The species  $[\text{Co}(\text{phen})_3]^{2+}$  is also found (calcd.) at  $m/z$  299.9 (299.6).

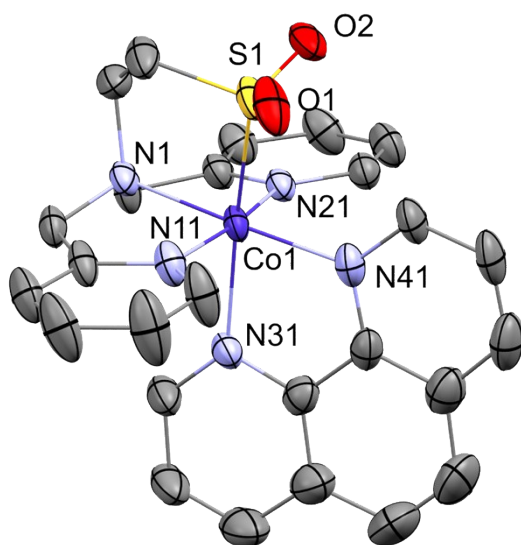

**Figure S14.** Displacements ellipsoid plot (50% probability level) of the oxidized compound  $[\text{Co}(\text{L}^1\text{SO}_2)(\text{phen})](\text{SbF}_6)_2$  at 110(2) K. Hydrogen atoms, non-coordinated anions, and lattice solvent molecules are omitted for clarity.

### Part 3 – Crystallographic Data

|                                                                                                                   | [1 <sub>Br</sub> ]                                                                                                   | [2 <sub>Cl</sub> ](BPh <sub>4</sub> ) <sub>2</sub>                                                                                                                                       | [Co(L <sup>1</sup> SO <sub>2</sub> )(phen)](SbF <sub>6</sub> ) <sub>2</sub>                                                                                                    |
|-------------------------------------------------------------------------------------------------------------------|----------------------------------------------------------------------------------------------------------------------|------------------------------------------------------------------------------------------------------------------------------------------------------------------------------------------|--------------------------------------------------------------------------------------------------------------------------------------------------------------------------------|
| Chemical formula                                                                                                  | C <sub>28</sub> H <sub>32</sub> Br <sub>4</sub> Co <sub>2</sub> N <sub>6</sub> S <sub>2</sub> ,<br>CH <sub>4</sub> O | C <sub>48</sub> H <sub>48</sub> Cl <sub>2</sub> Co <sub>2</sub> N <sub>10</sub> S <sub>2</sub> ,<br>2(C <sub>24</sub> H <sub>20</sub> B),<br>2(C <sub>3</sub> H <sub>6</sub> O), 0.42(O) | C <sub>26</sub> H <sub>24</sub> CoN <sub>5</sub> O <sub>2</sub> S, 2(F <sub>6</sub> Sb),<br>0.566(C <sub>4</sub> H <sub>10</sub> O),<br>1.434(C <sub>2</sub> H <sub>3</sub> N) |
| <i>M<sub>r</sub></i>                                                                                              | 986.26                                                                                                               | 1779.17                                                                                                                                                                                  | 1101.82                                                                                                                                                                        |
| Crystal system                                                                                                    | Monoclinic                                                                                                           | Monoclinic                                                                                                                                                                               | Monoclinic                                                                                                                                                                     |
| Space group                                                                                                       | <i>P</i> 2 <sub>1</sub> / <i>c</i>                                                                                   | <i>C</i> 2/ <i>c</i>                                                                                                                                                                     | <i>P</i> 2 <sub>1</sub> / <i>c</i>                                                                                                                                             |
| Cell lengths ( <i>a</i> , <i>b</i> , <i>c</i> ) (Å)                                                               | 15.7651(7),<br>11.9665(5),<br>19.6343(8)                                                                             | 19.0139(7),<br>20.1121(7),<br>27.0156(13)                                                                                                                                                | 21.5627 (5), 13.6523 (4),<br>14.0315 (4)                                                                                                                                       |
| Cell angles (α, β, γ) (°)                                                                                         | 90, 103.345(4), 90                                                                                                   | 90, 108.171(4), 90                                                                                                                                                                       | 90, 103.059 (3), 90                                                                                                                                                            |
| Cell volume (Å <sup>3</sup> )                                                                                     | 3604.1 (3)                                                                                                           | 9815.8 (7)                                                                                                                                                                               | 4023.8 (2)                                                                                                                                                                     |
| <i>Z</i>                                                                                                          | 4                                                                                                                    | 4                                                                                                                                                                                        | 4                                                                                                                                                                              |
| μ (mm <sup>-1</sup> )                                                                                             | 5.50                                                                                                                 | 0.49                                                                                                                                                                                     | 1.89                                                                                                                                                                           |
| Crystal size (mm)                                                                                                 | 0.11 × 0.08 × 0.02                                                                                                   | 0.26 × 0.19 × 0.10                                                                                                                                                                       | 0.29 × 0.09 × 0.05                                                                                                                                                             |
| Temperature (K)                                                                                                   | 110(2)                                                                                                               | 110(2)                                                                                                                                                                                   | 110(2)                                                                                                                                                                         |
| Diffractometer                                                                                                    | SuperNova, Dual,<br>Cu at zero, Atlas<br>detector                                                                    | SuperNova, Dual,<br>Cu at zero, Atlas<br>detector                                                                                                                                        | SuperNova, Dual, Cu at<br>zero, Atlas detector                                                                                                                                 |
| Radiation type                                                                                                    | Mo <i>K</i> α                                                                                                        | Mo <i>K</i> α                                                                                                                                                                            | Mo <i>K</i> α                                                                                                                                                                  |
| <i>T<sub>min</sub></i> , <i>T<sub>max</sub></i>                                                                   | 0.734, 0.982                                                                                                         | 0.520, 1.000                                                                                                                                                                             | 0.439, 1.000                                                                                                                                                                   |
| No. of measured,<br>independent and<br>observed [ <i>I</i> > 2σ( <i>I</i> )]<br>reflections                       | 28658, 6355, 4720                                                                                                    | 38544, 11261, 8613                                                                                                                                                                       | 50549, 7091, 5615                                                                                                                                                              |
| <i>R<sub>int</sub></i>                                                                                            | 0.065                                                                                                                | 0.038                                                                                                                                                                                    | 0.049                                                                                                                                                                          |
| (sin θ/λ) <sub>max</sub> (Å <sup>-1</sup> )                                                                       | 0.595                                                                                                                | 0.650                                                                                                                                                                                    | 0.595                                                                                                                                                                          |
| <i>R</i> [ <i>F</i> <sup>2</sup> > 2σ( <i>F</i> <sup>2</sup> )], <i>wR</i> ( <i>F</i> <sup>2</sup> ),<br><i>S</i> | 0.046, 0.110, 1.04                                                                                                   | 0.043, 0.105, 1.02                                                                                                                                                                       | 0.039, 0.102, 1.04                                                                                                                                                             |
| No. of reflections                                                                                                | 6355                                                                                                                 | 11261                                                                                                                                                                                    | 7091                                                                                                                                                                           |
| No. of parameters                                                                                                 | 411                                                                                                                  | 652                                                                                                                                                                                      | 661                                                                                                                                                                            |
| No. of restraints                                                                                                 | 39                                                                                                                   | 309                                                                                                                                                                                      | 404                                                                                                                                                                            |
| H-atom treatment                                                                                                  | H-atoms treated by<br>a mixture of<br>independent and<br>constrained<br>refinement                                   | H-atom parameters<br>constrained                                                                                                                                                         | H-atom parameters<br>constrained                                                                                                                                               |
| Δρ <sub>max</sub> , Δρ <sub>min</sub> (e Å <sup>-3</sup> )                                                        | 1.94, -0.58                                                                                                          | 0.56, -0.31                                                                                                                                                                              | 0.79, -0.77                                                                                                                                                                    |

**Table S1.** Crystallographic Data for the crystal structures in the present work.

**Table S2.** Selected bond distances and bond angles in [Co(L<sup>1</sup>SO<sub>2</sub>)(phen)](SbF<sub>6</sub>)<sub>2</sub>.

| Atoms   | distance (Å) | Atoms       | Bond angles (°) |
|---------|--------------|-------------|-----------------|
| Co1–N1  | 1.976(4)     | S1–Co1–N1   | 86.78(11)       |
| Co1–N11 | 1.921(4)     | S1–Co1–N11  | 88.59(13)       |
| Co1–N21 | 1.929(4)     | S1–Co1–N21  | 95.64(11)       |
| Co1–N31 | 2.084(4)     | S1–Co1–N31  | 172.01(12)      |
| Co1–N41 | 1.969(4)     | S1–Co1–N41  | 92.32(12)       |
| Co1–S1  | 2.1866(13)   | N31–Co1–N41 | 82.36(16)       |
| S1–O1   | 1.460(4)     | N31–Co1–N1  | 98.77(15)       |
| S1–O2   | 1.456(4)     | N21–Co1–N1  | 84.00(16)       |

## Part 4 – Computational Data

**Table S3.** Bond energies and coordinates of the optimized structures of [1\*] and [4]<sup>2+</sup>.

| [1*] E = -4845.07 kcal/mol |           |           |           | [4] <sup>2+</sup> E = -6598.97 kcal/mol |           |           |           |
|----------------------------|-----------|-----------|-----------|-----------------------------------------|-----------|-----------|-----------|
| 1.C                        | 2.844744  | 6.382931  | 15.971685 | 1.Co                                    | 0.225934  | 0.048155  | 0.362324  |
| 2.Co                       | 3.386012  | 8.479512  | 13.894811 | 2.H                                     | -2.114316 | -0.727316 | -1.573008 |
| 3.H                        | 3.806330  | 6.749578  | 16.320430 | 3.C                                     | 1.002934  | -1.078319 | -2.425821 |
| 4.C                        | 0.630152  | 7.294129  | 13.186178 | 4.C                                     | 3.007437  | -0.849292 | 1.131444  |
| 5.Cl                       | 4.160892  | 7.699974  | 11.877657 | 5.H                                     | 0.841295  | -2.527154 | 1.904743  |
| 6.Cl                       | 5.401121  | 8.524228  | 15.084964 | 6.H                                     | -0.440469 | -4.609507 | 2.303702  |
| 7.H                        | 0.963185  | 6.719459  | 12.312007 | 7.S                                     | -0.095386 | 0.694749  | 2.456075  |
| 8.H                        | -0.468560 | 7.265252  | 13.189977 | 8.C                                     | -0.886231 | -3.805997 | 1.722546  |
| 9.N                        | 2.337893  | 7.008872  | 14.892136 | 9.C                                     | -2.224593 | 1.407243  | 1.030650  |
| 10.N                       | 1.167871  | 8.645361  | 13.056652 | 10.H                                    | -3.302185 | 1.434723  | 0.825238  |
| 11.N                       | 2.832228  | 10.450830 | 14.190168 | 11.H                                    | -1.841954 | 2.430734  | 1.008494  |
| 12.C                       | 1.517070  | 10.739125 | 14.240323 | 12.C                                    | -1.892457 | 0.794848  | 2.361932  |
| 13.C                       | 1.055172  | 12.029467 | 14.479685 | 13.H                                    | -2.362861 | -0.181415 | 2.516533  |
| 14.H                       | -0.015117 | 12.222206 | 14.513083 | 14.H                                    | -2.232946 | 1.461732  | 3.163513  |
| 15.C                       | 0.972497  | 9.154997  | 11.695599 | 15.C                                    | -0.155582 | -2.649756 | 1.498885  |
| 16.H                       | 1.474817  | 8.495985  | 10.985626 | 16.N                                    | -0.648650 | -1.628100 | 0.780241  |
| 17.H                       | 1.412781  | 10.151820 | 11.609553 | 17.N                                    | 0.757437  | 1.827715  | -0.178114 |
| 18.H                       | 0.426011  | 4.093677  | 16.586330 | 18.N                                    | -1.556311 | 0.671238  | -0.103832 |
| 19.C                       | 2.198266  | 5.333140  | 16.605779 | 19.C                                    | -2.332335 | -0.530196 | -0.518334 |
| 20.H                       | 2.658506  | 4.863296  | 17.472281 | 20.H                                    | -3.407678 | -0.346257 | -0.434178 |
| 21.C                       | 1.974770  | 13.056275 | 14.664189 | 21.C                                    | -0.164033 | 2.445102  | -0.950101 |
| 22.H                       | 1.634753  | 14.074028 | 14.849059 | 22.C                                    | 0.041414  | 3.725416  | -1.447247 |
| 23.C                       | 3.332649  | 12.760444 | 14.594965 | 23.H                                    | -0.727646 | 4.193912  | -2.056413 |
| 24.H                       | 4.091563  | 13.529311 | 14.723199 | 24.C                                    | 1.229623  | 4.382473  | -1.150050 |
| 25.C                       | 3.717862  | 11.447921 | 14.360959 | 25.H                                    | 1.414347  | 5.384718  | -1.531755 |
| 26.H                       | 4.766855  | 11.166158 | 14.316009 | 26.C                                    | 2.166701  | 3.744766  | -0.344940 |
| 27.C                       | 0.598254  | 9.569623  | 14.042648 | 27.H                                    | 3.105451  | 4.220961  | -0.072635 |
| 28.H                       | 0.512465  | 9.038219  | 14.998775 | 28.C                                    | 1.893604  | 2.471621  | 0.131307  |
| 29.H                       | -0.412798 | 9.911644  | 13.786780 | 29.H                                    | 2.592885  | 1.952876  | 0.776176  |
| 30.C                       | 1.144570  | 6.603320  | 14.416475 | 30.C                                    | -1.379947 | 1.626550  | -1.231420 |
| 31.C                       | 0.432026  | 5.563610  | 15.008922 | 31.H                                    | -2.274807 | 2.245917  | -1.354842 |
| 32.H                       | -0.534062 | 5.273564  | 14.600911 | 32.H                                    | -1.236512 | 1.060269  | -2.156173 |
| 33.C                       | 0.966737  | 4.912028  | 16.113378 | 33.C                                    | -1.902080 | -1.709693 | 0.287000  |
| 34.H                       | -0.096240 | 9.220218  | 11.439182 | 34.C                                    | -2.693054 | -2.834734 | 0.486530  |
|                            |           |           |           | 35.H                                    | -3.702000 | -2.860026 | 0.082239  |
|                            |           |           |           | 36.C                                    | -2.174893 | -3.903235 | 1.207342  |
|                            |           |           |           | 37.H                                    | -2.774962 | -4.795464 | 1.375419  |
|                            |           |           |           | 38.N                                    | 1.935529  | -0.504262 | 0.860571  |
|                            |           |           |           | 39.C                                    | 4.337904  | -1.277195 | 1.468881  |
|                            |           |           |           | 40.H                                    | 4.766005  | -0.591534 | 2.207952  |
|                            |           |           |           | 41.H                                    | 4.959583  | -1.281077 | 0.567253  |
|                            |           |           |           | 42.H                                    | 4.299166  | -2.287826 | 1.889608  |
|                            |           |           |           | 43.N                                    | 0.614222  | -0.616783 | -1.436593 |
|                            |           |           |           | 44.C                                    | 1.479703  | -1.647329 | -3.657692 |
|                            |           |           |           | 45.H                                    | 2.308469  | -2.330527 | -3.443375 |
|                            |           |           |           | 46.H                                    | 1.827103  | -0.846373 | -4.318629 |
|                            |           |           |           | 47.H                                    | 0.668331  | -2.199596 | -4.143453 |

**Table S4.** Bond energies and coordinates of the optimized structures of  $[2^*]_{\text{fac}}^+$  and  $[2^*]_{\text{mer}}^+$ .

| $[2^*]_{\text{fac}}^+$ E = -7754.13 kcal/mol |           |           |           | $[2^*]_{\text{mer}}^+$ E = -7749.08 kcal/mol |           |           |           |
|----------------------------------------------|-----------|-----------|-----------|----------------------------------------------|-----------|-----------|-----------|
| 1.Co                                         | -4.705905 | -4.191381 | 7.721768  | 1.Co                                         | 1.027591  | -0.388613 | -0.031175 |
| 2.Cl                                         | -5.855791 | -6.008439 | 8.430441  | 2.H                                          | -2.122372 | -0.740773 | -1.540858 |
| 3.N                                          | -6.345606 | -3.202751 | 6.677648  | 3.H                                          | 3.360204  | -0.763558 | 1.895706  |
| 4.N                                          | -4.250841 | -4.905331 | 5.715097  | 4.H                                          | -0.449241 | -0.863034 | -2.976517 |
| 5.N                                          | -4.861196 | -3.236899 | 9.600409  | 5.H                                          | 1.280405  | -3.310357 | 0.736888  |
| 6.N                                          | -2.945247 | -4.800594 | 8.718999  | 6.H                                          | -0.170476 | -5.166245 | 1.520492  |
| 7.C                                          | -2.675310 | -1.519675 | 7.405107  | 7.Cl                                         | 1.178569  | 0.168456  | 2.155637  |
| 8.H                                          | -1.852054 | -2.172513 | 7.703687  | 8.C                                          | -0.616795 | -4.251198 | 1.136424  |
| 9.H                                          | -3.143757 | -1.124670 | 8.309402  | 9.C                                          | -1.692184 | 1.129464  | 1.152271  |
| 10.C                                         | -4.774843 | -1.395976 | 6.266849  | 10.H                                         | -2.712741 | 1.533745  | 1.052171  |
| 11.H                                         | -4.503692 | -0.735370 | 5.428151  | 11.H                                         | -1.009785 | 1.929698  | 1.441771  |
| 12.H                                         | -4.951782 | -0.736280 | 7.126774  | 12.H                                         | 5.324458  | -2.433315 | -2.259971 |
| 13.C                                         | -2.998836 | -2.842053 | 5.438769  | 13.H                                         | 6.741920  | -2.388297 | -0.239710 |
| 14.H                                         | -1.987411 | -3.141463 | 5.744026  | 14.H                                         | 4.060648  | -2.500192 | -3.838912 |
| 15.H                                         | -2.865795 | -2.075473 | 4.659036  | 15.C                                         | 0.197553  | -3.216883 | 0.696856  |
| 16.C                                         | -6.077903 | -2.089215 | 5.973908  | 16.N                                         | -0.279560 | -2.058093 | 0.215096  |
| 17.C                                         | -6.998372 | -1.532939 | 5.087258  | 17.N                                         | 1.206806  | 1.586412  | -0.858767 |
| 18.H                                         | -6.740562 | -0.635923 | 4.526362  | 18.N                                         | -1.249268 | 0.525910  | -0.114803 |
| 19.C                                         | -8.243958 | -2.131660 | 4.936854  | 19.C                                         | -2.109456 | -0.607361 | -0.451973 |
| 20.H                                         | -8.979257 | -1.712161 | 4.251142  | 20.H                                         | -3.155706 | -0.435067 | -0.156522 |
| 21.C                                         | -8.526369 | -3.275585 | 5.675993  | 21.C                                         | 0.102223  | 2.305213  | -1.130793 |
| 22.H                                         | -9.485956 | -3.782868 | 5.596218  | 22.C                                         | 0.160332  | 3.666524  | -1.419193 |
| 23.C                                         | -7.548935 | -3.780660 | 6.523259  | 23.H                                         | -0.757564 | 4.215473  | -1.622599 |
| 24.H                                         | -7.706654 | -4.686142 | 7.107162  | 24.C                                         | 1.391769  | 4.310979  | -1.433678 |
| 25.C                                         | -3.656209 | -4.062529 | 4.853087  | 25.H                                         | 1.456298  | 5.376556  | -1.650318 |
| 26.C                                         | -3.554439 | -4.344141 | 3.491686  | 26.C                                         | 2.532893  | 3.568954  | -1.151739 |
| 27.H                                         | -3.076267 | -3.630803 | 2.822241  | 27.H                                         | 3.521119  | 4.024245  | -1.139748 |
| 28.C                                         | -4.061924 | -5.543906 | 3.006254  | 28.C                                         | 2.391425  | 2.217475  | -0.868029 |
| 29.H                                         | -3.991066 | -5.785066 | 1.946234  | 29.H                                         | 3.261307  | 1.610450  | -0.629207 |
| 30.C                                         | -4.662879 | -6.423071 | 3.900865  | 30.C                                         | -1.199831 | 1.548082  | -1.159184 |
| 31.H                                         | -5.075420 | -7.375574 | 3.573501  | 31.H                                         | -2.042636 | 2.253637  | -1.091752 |
| 32.C                                         | -4.744702 | -6.060986 | 5.238857  | 32.H                                         | -1.281495 | 1.065318  | -2.140543 |
| 33.H                                         | -5.226635 | -6.698542 | 5.978238  | 33.C                                         | -1.613672 | -1.892920 | 0.159027  |
| 34.C                                         | -3.932095 | -3.583248 | 10.519298 | 34.C                                         | -2.496773 | -2.880920 | 0.587980  |
| 35.C                                         | -4.025005 | -3.150496 | 11.845892 | 35.H                                         | -3.570120 | -2.705476 | 0.538249  |
| 36.H                                         | -3.276552 | -3.435930 | 12.578736 | 36.C                                         | -1.995148 | -4.078860 | 1.083286  |
| 37.C                                         | -5.093056 | -2.356050 | 12.235609 | 37.H                                         | -2.670368 | -4.860149 | 1.429881  |
| 38.H                                         | -5.178711 | -2.018279 | 13.267255 | 38.N                                         | 1.422400  | -1.190525 | -2.175879 |
| 39.C                                         | -6.052573 | -2.011876 | 11.288566 | 39.C                                         | 0.551391  | -1.225638 | -3.190467 |
| 40.H                                         | -6.916109 | -1.401787 | 11.545911 | 40.C                                         | 0.849618  | -1.690136 | -4.464344 |
| 41.C                                         | -5.893466 | -2.477212 | 9.991084  | 41.C                                         | 2.138401  | -2.152002 | -4.706435 |
| 42.H                                         | -6.630373 | -2.244455 | 9.225980  | 42.H                                         | 0.086212  | -1.687744 | -5.240152 |
| 43.C                                         | -2.852052 | -4.454802 | 10.022363 | 43.H                                         | 2.426265  | -2.525916 | -5.687943 |
| 44.C                                         | -1.806094 | -4.921040 | 10.825272 | 44.C                                         | 3.053681  | -2.133903 | -3.665922 |
| 45.H                                         | -1.736805 | -4.636354 | 11.870672 | 45.C                                         | 2.668896  | -1.651004 | -2.407937 |
| 46.C                                         | -0.848360 | -5.765195 | 10.283101 | 46.N                                         | 3.057823  | -1.164319 | -0.094266 |
| 47.H                                         | -0.032297 | -6.138298 | 10.900046 | 47.C                                         | 3.583812  | -1.629359 | -1.250455 |
| 48.C                                         | -0.958702 | -6.131745 | 8.945387  | 48.C                                         | 4.909374  | -2.070370 | -1.325077 |
| 49.H                                         | -0.242108 | -6.802738 | 8.475968  | 49.C                                         | 5.708780  | -2.046698 | -0.191092 |
| 50.C                                         | -2.020844 | -5.625868 | 8.209660  | 50.C                                         | 5.160710  | -1.581043 | 0.998129  |
| 51.H                                         | -2.150068 | -5.899470 | 7.165182  | 51.C                                         | 3.840692  | -1.149859 | 0.997824  |
| 52.N                                         | -3.661985 | -2.286870 | 6.627994  | 52.H                                         | 5.739073  | -1.543390 | 1.919316  |
| 53.H                                         | -2.261166 | -0.676678 | 6.829625  | 53.H                                         | -1.670457 | 0.382904  | 1.947165  |

**Table S5.** Bond energies and coordinates of the optimized structures of  $[3]^{2+}_{\text{fac}}$  and  $[3]^{2+}_{\text{mer}}$ .

| $[3]^{2+}_{\text{fac}}$ E = -7880.35 kcal/mol |           |           |           | $[3]^{2+}_{\text{mer}}$ E = -7888.61 kcal/mol |           |           |           |
|-----------------------------------------------|-----------|-----------|-----------|-----------------------------------------------|-----------|-----------|-----------|
| 1.N                                           | -1.257881 | -1.556936 | -0.933532 | 1.Co                                          | 0.883410  | -0.387903 | -0.117866 |
| 2.C                                           | -1.796961 | -0.999977 | -2.212091 | 2.H                                           | -2.169401 | -0.784362 | -1.395651 |
| 3.C                                           | -1.938285 | 0.468333  | -2.100484 | 3.H                                           | 2.966779  | -0.903247 | 2.038423  |
| 4.C                                           | -2.877227 | 1.221295  | -2.797532 | 4.H                                           | -0.812286 | -1.096596 | -2.814957 |
| 5.C                                           | -2.919069 | 2.595655  | -2.604635 | 5.H                                           | 1.585563  | -3.156498 | 0.964154  |
| 6.C                                           | -2.045471 | 3.162100  | -1.680932 | 6.H                                           | 0.253872  | -5.168991 | 1.502979  |
| 7.C                                           | -1.138599 | 2.347343  | -1.021805 | 7.S                                           | 0.957569  | 0.187927  | 2.023461  |
| 8.N                                           | -1.045357 | 1.023313  | -1.258463 | 8.C                                           | -0.244253 | -4.276639 | 1.129375  |
| 9.C                                           | -2.346005 | -1.712954 | 0.076091  | 9.C                                           | -1.265360 | 1.210287  | 1.086199  |
| 10.C                                          | -2.288864 | -0.677590 | 1.165932  | 10.H                                          | -2.347751 | 1.406850  | 1.080348  |
| 11.N                                          | -1.189680 | 0.100727  | 1.218419  | 11.H                                          | -0.739757 | 2.165911  | 1.008815  |
| 12.C                                          | -1.073286 | 0.995279  | 2.216401  | 12.C                                          | -0.784950 | 0.499868  | 2.315528  |
| 13.C                                          | -2.044685 | 1.156119  | 3.191834  | 13.H                                          | -1.343051 | -0.414836 | 2.545500  |
| 14.C                                          | -3.188805 | 0.364694  | 3.133417  | 14.H                                          | -0.864142 | 1.167200  | 3.183278  |
| 15.C                                          | -3.310087 | -0.563613 | 2.107043  | 15.C                                          | 0.510840  | -3.154910 | 0.825541  |
| 16.C                                          | -0.632944 | -2.872204 | -1.287997 | 16.N                                          | -0.037762 | -2.019315 | 0.356449  |
| 17.C                                          | 0.585630  | -2.680497 | -2.174924 | 17.N                                          | 1.407109  | 1.403917  | -0.684237 |
| 18.S                                          | 1.297092  | -1.013581 | -1.982658 | 18.N                                          | -0.933226 | 0.419244  | -0.162117 |
| 19.Co                                         | 0.093407  | -0.241353 | -0.271347 | 19.C                                          | -1.923892 | -0.676965 | -0.334278 |
| 20.C                                          | 2.288064  | -0.683025 | 1.460969  | 20.H                                          | -2.867477 | -0.422296 | 0.162464  |
| 21.C                                          | 3.083559  | -1.228888 | 2.470999  | 21.C                                          | 0.394506  | 2.111334  | -1.238657 |
| 22.C                                          | 2.692339  | -2.395917 | 3.106657  | 22.C                                          | 0.570231  | 3.407286  | -1.706896 |
| 23.C                                          | 1.484181  | -2.972795 | 2.733172  | 23.H                                          | -0.271980 | 3.946109  | -2.137271 |
| 24.C                                          | 0.740948  | -2.374239 | 1.727543  | 24.C                                          | 1.822547  | 4.003687  | -1.603574 |
| 25.N                                          | 1.129007  | -1.271715 | 1.065736  | 25.H                                          | 1.983296  | 5.018744  | -1.963952 |
| 26.C                                          | 2.607449  | 0.543212  | 0.746081  | 26.C                                          | 2.851889  | 3.287223  | -1.004788 |
| 27.C                                          | 3.818939  | 1.226965  | 0.851259  | 27.H                                          | 3.842676  | 3.717246  | -0.872166 |
| 28.C                                          | 4.066162  | 2.322084  | 0.037279  | 28.C                                          | 2.604488  | 1.999946  | -0.550054 |
| 29.C                                          | 3.100865  | 2.678775  | -0.896476 | 29.H                                          | 3.382297  | 1.431918  | -0.053202 |
| 30.C                                          | 1.913307  | 1.964374  | -0.944779 | 30.C                                          | -0.916070 | 1.388920  | -1.286984 |
| 31.N                                          | 1.630181  | 0.948217  | -0.106468 | 31.H                                          | -1.760847 | 2.086612  | -1.214253 |
| 32.H                                          | -1.056419 | -1.204446 | -2.993100 | 32.H                                          | -1.018819 | 0.859130  | -2.237167 |
| 33.H                                          | -2.736448 | -1.498366 | -2.479404 | 33.C                                          | -1.379133 | -1.966618 | 0.199426  |
| 34.H                                          | -3.566994 | 0.727671  | -3.479554 | 34.C                                          | -2.196792 | -3.052556 | 0.494565  |
| 35.H                                          | -3.637732 | 3.210501  | -3.144610 | 35.H                                          | -3.274512 | -2.969270 | 0.365248  |
| 36.H                                          | -2.063350 | 4.227230  | -1.458445 | 36.C                                          | -1.624065 | -4.229149 | 0.961174  |
| 37.H                                          | -0.467934 | 2.764643  | -0.278221 | 37.H                                          | -2.246771 | -5.089984 | 1.200496  |
| 38.H                                          | -2.267738 | -2.710972 | 0.524985  | 38.N                                          | 1.123316  | -1.091588 | -2.071071 |
| 39.H                                          | -3.327346 | -1.688499 | -0.412336 | 39.C                                          | 0.229012  | -1.268614 | -3.056951 |
| 40.H                                          | -0.167524 | 1.596986  | 2.225495  | 40.C                                          | 0.555065  | -1.667208 | -4.345525 |
| 41.H                                          | -1.901842 | 1.894140  | 3.978692  | 41.C                                          | 1.890490  | -1.897500 | -4.650812 |
| 42.H                                          | -3.976722 | 0.467923  | 3.878291  | 42.H                                          | -0.232538 | -1.787976 | -5.086709 |
| 43.H                                          | -4.189856 | -1.201327 | 2.035915  | 43.H                                          | 2.197544  | -2.191131 | -5.653367 |
| 44.H                                          | -0.348568 | -3.370589 | -0.362659 | 44.C                                          | 2.824626  | -1.772580 | -3.634137 |
| 45.H                                          | -1.392800 | -3.504901 | -1.770599 | 45.C                                          | 2.415278  | -1.392996 | -2.352881 |
| 46.H                                          | 0.344973  | -2.818248 | -3.236774 | 46.N                                          | 2.724889  | -1.054139 | -0.016407 |
| 47.H                                          | 1.339718  | -3.433296 | -1.919403 | 47.C                                          | 3.314933  | -1.373015 | -1.199416 |
| 48.H                                          | 4.005147  | -0.736194 | 2.765381  | 48.C                                          | 4.665372  | -1.723773 | -1.267041 |
| 49.H                                          | 3.308375  | -2.835423 | 3.889533  | 49.C                                          | 5.430021  | -1.777050 | -0.111038 |
| 50.H                                          | 1.106545  | -3.874101 | 3.211933  | 50.C                                          | 4.813458  | -1.487862 | 1.099551  |
| 51.H                                          | -0.216500 | -2.799900 | 1.457989  | 51.C                                          | 3.473044  | -1.130484 | 1.102936  |
| 52.H                                          | 4.581502  | 0.887111  | 1.545385  | 52.H                                          | 5.351886  | -1.529209 | 2.044471  |
| 53.H                                          | 5.009767  | 2.861066  | 0.105293  | 53.H                                          | 5.121264  | -1.966469 | -2.221578 |
| 54.H                                          | 3.259107  | 3.491737  | -1.602218 | 54.H                                          | 6.483217  | -2.050537 | -0.156795 |
| 55.H                                          | 1.175673  | 2.194877  | -1.703434 | 55.H                                          | 3.869016  | -1.985257 | -3.839506 |

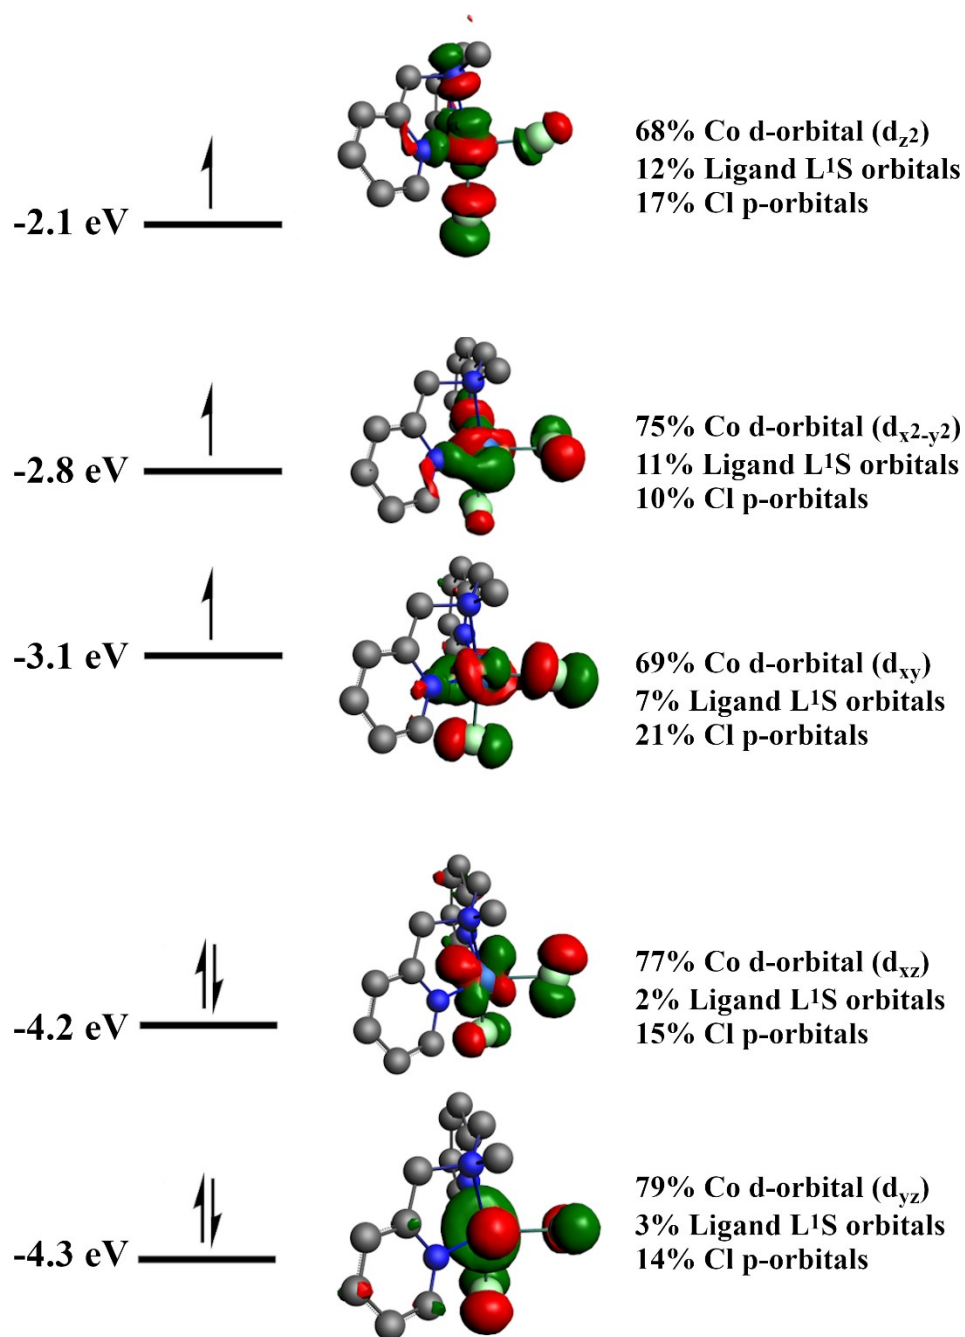

**Figure S15.** Several frontier orbitals of [I\*] associated with Co d-orbitals along with their energies, orbital visualization, and orbital composition.

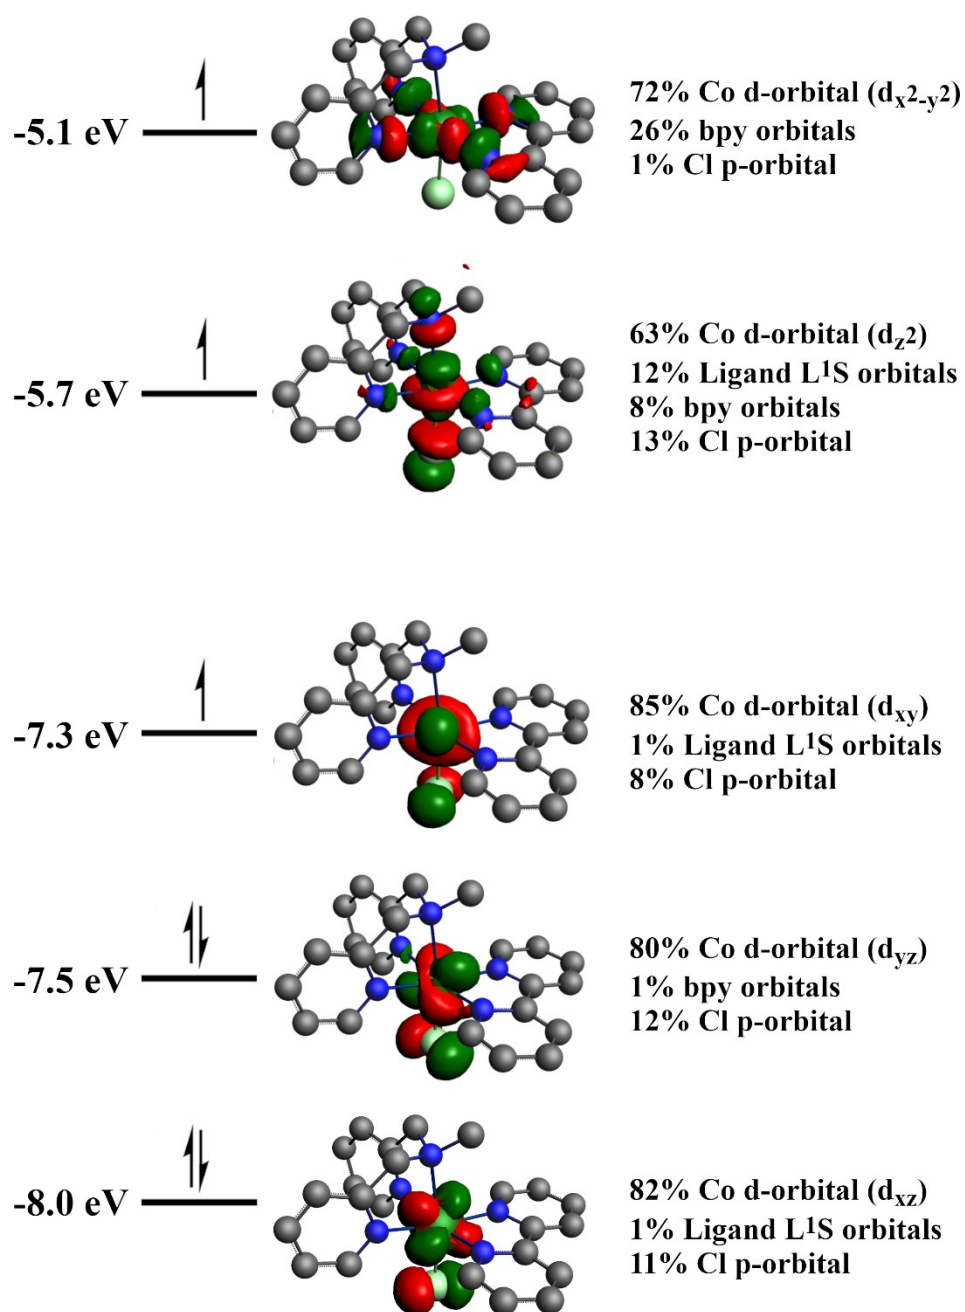

**Figure S16.** Several frontier orbitals of  $[2^*]_{\text{fac}}^+$  associated with Co d-orbitals along with their energies, orbital visualization, and orbital composition.



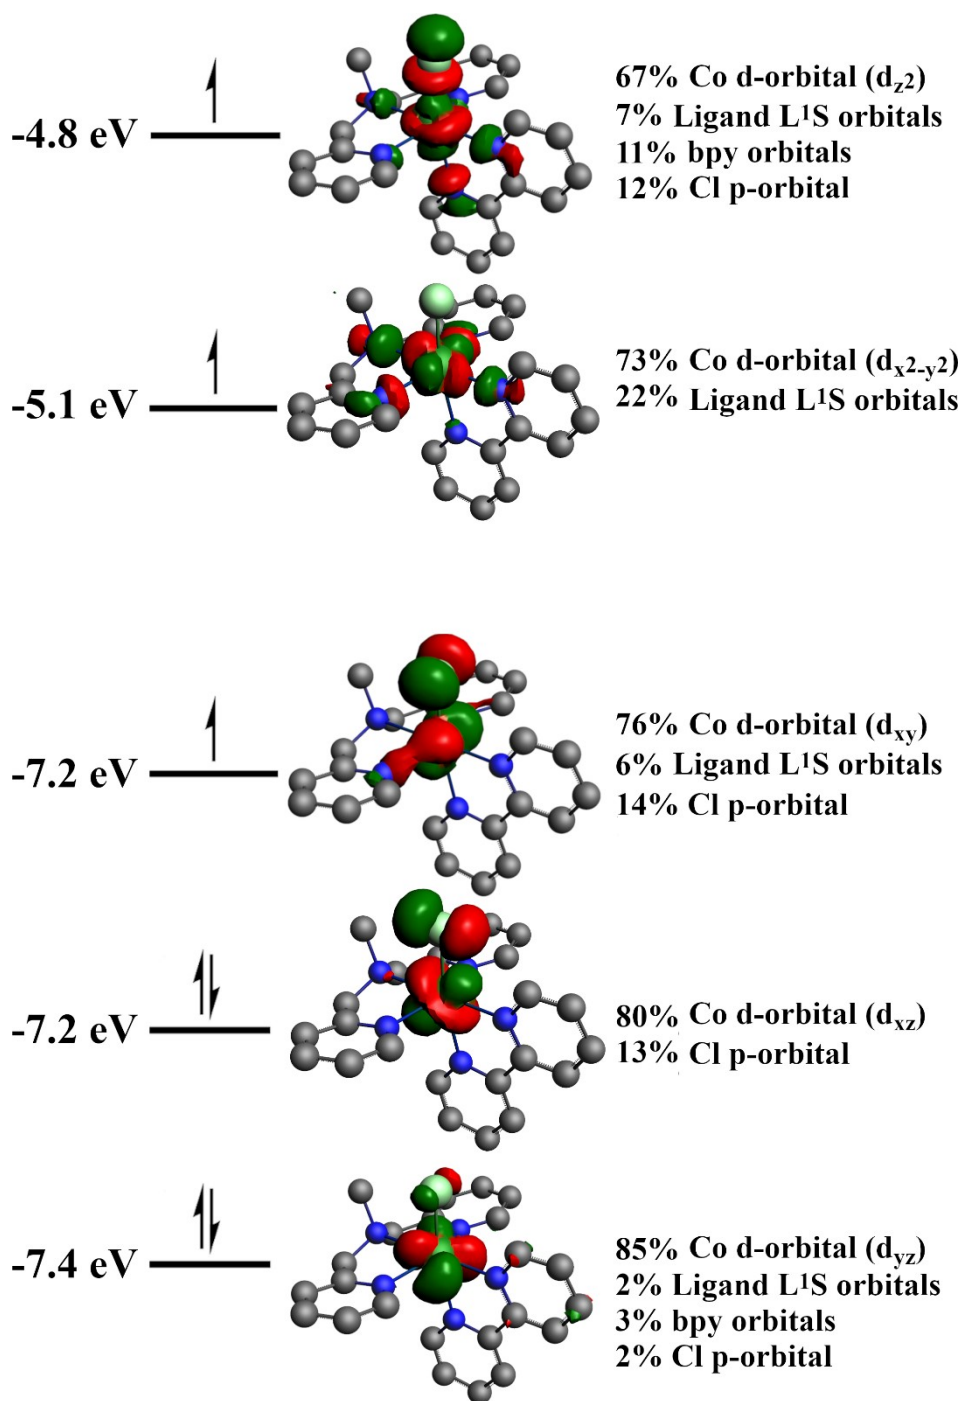

**Figure S17.** Several frontier orbitals of  $[2^*]^+_{\text{mer}}$  associated with Co d-orbitals along with their energies, orbital visualization, and orbital composition.

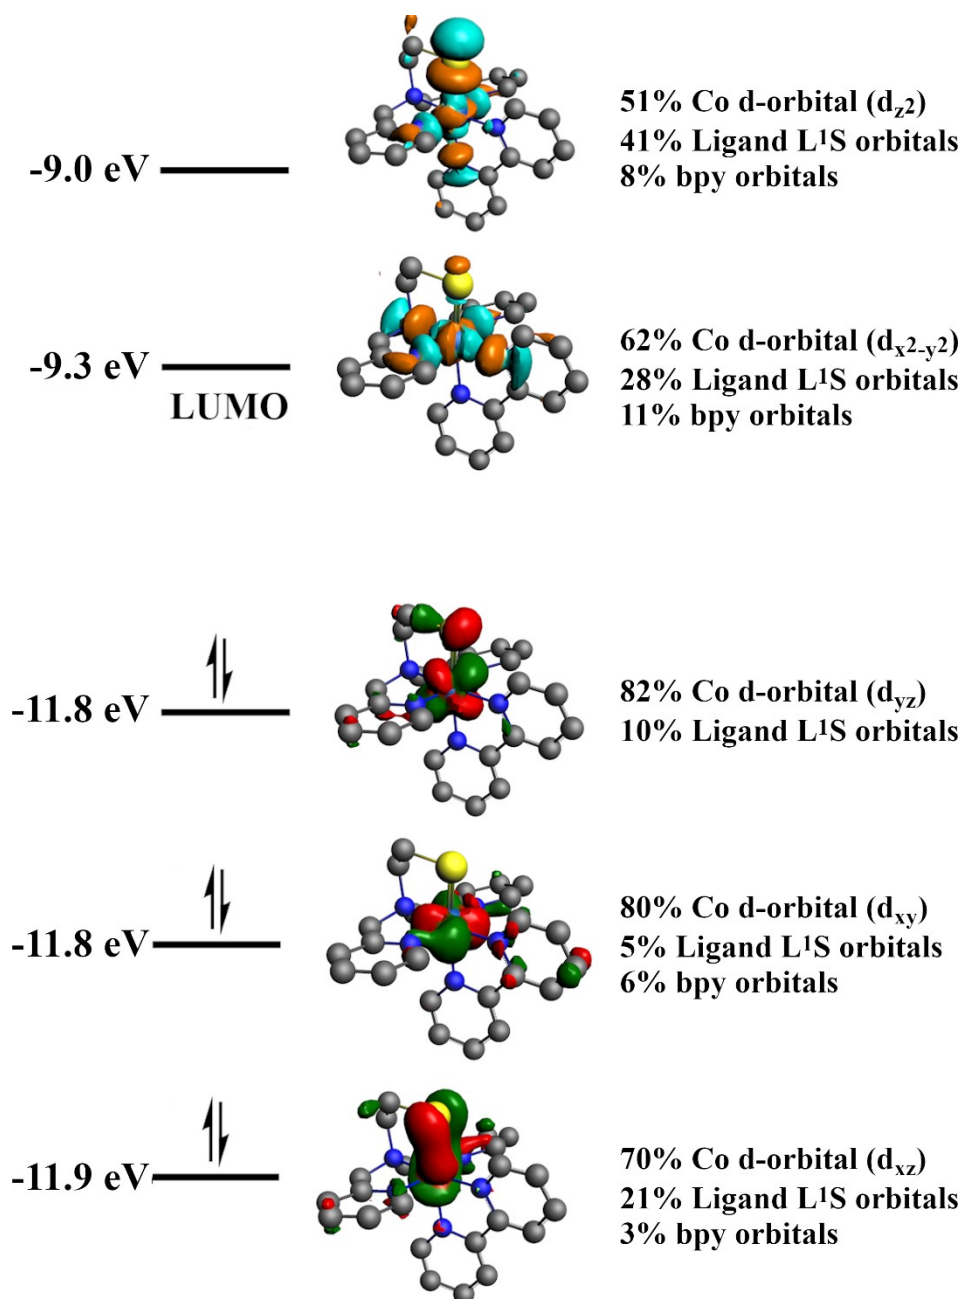

**Figure S18.** Several frontier orbitals of  $[3]^{2+}_{mer}$  associated with Co d-orbitals along with their energies, orbital visualization, and orbital composition.

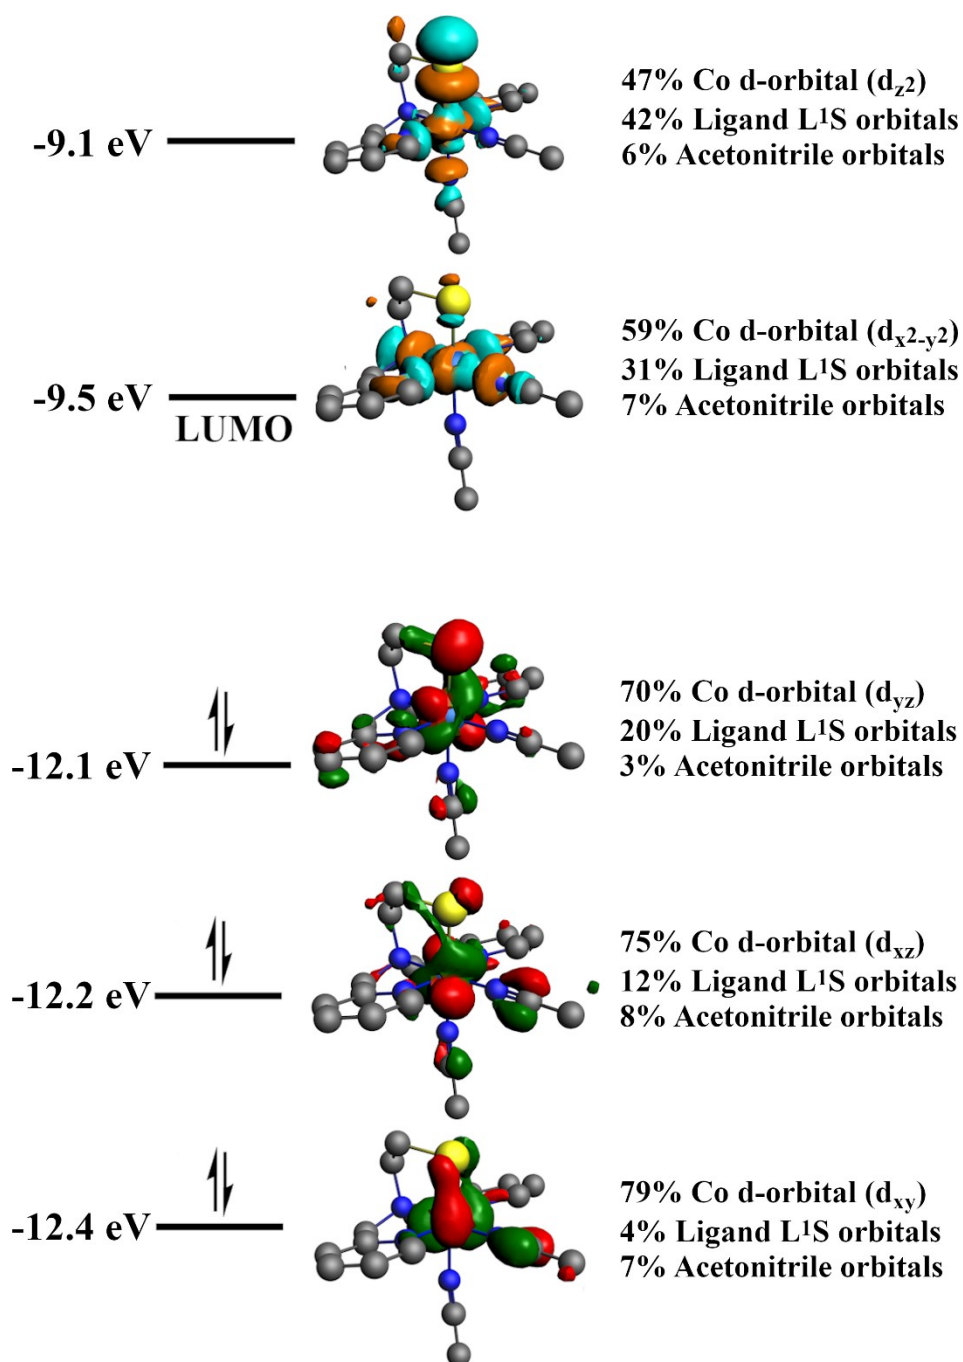

**Figure S19.** Several frontier orbitals of  $[4]^{2+}$  associated with Co d-orbitals along with their energies, orbital visualization, and orbital composition.
